# Supplementary material for: Widespread duplications in the genomes of laboratory stocks of Dictyostelium discoideum
Source: Genome Biol. 2008 Apr 22;9(4):R75. doi: 10.1186/gb-2008-9-4-r75 (PMC2643946; doi:10.1186/gb-2008-9-4-r75)
Supplement: Additional data file 4 — Genes present on the Ax2 duplication, genes on the chromosome 5 duplication present in many Ax3 lines, and legends for Figures S1, S2 and S3. [file gb-2008-9-4-r75-S4.pdf]

## Supplementary material

| Gene ID     | Annotation                                              |
|-------------|---------------------------------------------------------|
| DDB0190413  | Formin: <i>forE</i>                                     |
| DDB0201787  | Putative transport transmembrane protein                |
| DDB0190415  | Acetyltransferase (GNAT) family + protein kinase domain |
| DDB0190416  | TatD related DNase domain                               |
| DDB0237678  | -                                                       |
| DDB0237324* | rnu2b – spliceosomal ncRNA gene                         |
| DDB0190418  | Protein kinase: <i>irID</i>                             |
| DDB0216669  | Protein kinase: <i>irIC</i>                             |
| DDB0190420* | -                                                       |
| DDB0190421  | EF hand containing                                      |
| DDB0190422  | Histone-like transcription factor                       |
| DDB0190423* | Contains KOW motif                                      |
| DDB0190424  | Mak16l (involved in ribosome biosynthesis)              |

**Table S1.** Genes present in the Ax2 duplication. Genes marked with an asterisk (\*) do not have probes on our array.

| Gene ID     | Annotation                         |
|-------------|------------------------------------|
| DDB0219507  | -                                  |
| DDB0188659  | RNA recognition motif              |
| DDB0188660  | -                                  |
| DDB0188661  | rps9 (40S ribosomal protein S9)    |
| DDB0188662* | -                                  |
| DDB0188663* | -                                  |
| DDB0188664* | -                                  |
| DDB0188665  | <i>sigF</i>                        |
| DDB0188666* | -                                  |
| DDB0188667  | Cellulase domain                   |
| DDB0188669* | -                                  |
| DDB0216146  | -                                  |
| DDB0188671  | Pumilio-family RNA binding protein |
| DDB0215951* | -                                  |
| DDB0188672* | -                                  |
| DDB0188673  | -                                  |
| DDB0188674  | Acyl-CoA oxidase                   |
| DDB0188675* | Contains FNIP repeat               |
| DDB0188676* | -                                  |
| DDB0188677  | -                                  |
| DDB0188678  | -                                  |
| DDB0219508* | -                                  |
| DDB0219509* | -                                  |
| DDB0188681* | -                                  |
| DDB0188682* | <i>grxA</i> : glutaredoxin         |
| DDB0215953* | -                                  |
| DDB0188683* | DnaJ domain                        |
| DDB0188684* | -                                  |
| DDB0188685* | -                                  |
| DDB0188686  | Sepiapterin reductase              |
| DDB0188687  | <i>gxcL</i> (RhoGEF domain)        |

**Table S2.** Genes present in the chromosome 5 duplication found in many strains derived from Ax3. Genes marked with an asterisk (\*) do not have probes on our array.

## Legends to supplementary figures

**Figure S1 (Additional data file 1).** The Ax3/4 duplication on chromosome 2. The known duplication on chromosome 2 of the sequenced strain Ax4(Ku) is clearly apparent in comparison with our reference strain Ax2(Ka) at the level of genomic DNA. All probes for chromosome 2 genes are ordered according to dictyBase assembly version 2.5, and log2 ratios indicated by vertical lines.

**Figure S2 (Additional data file 2).** Genealogy of NC4-derived strains, combining known relationships with those posited from our study. Strains beneath vertical lines alone arose by simple lineal descent of haploid lines, with or without selection and/or mutagenesis; horizontal lines divide multiple lines of simple descent from the same strain (at different times); strains beneath conjoining vertical and diagonal lines arose through parasexual crosses: both haploid parents are indicated, but the diploid intermediate is omitted for clarity. The dashed blue vertical line divides strains that possess the 2-gene duplication on chromosome 3 (left) from those that lack it (right). We assume that strain DdB was selected in the Sussman laboratory after the isolation of the brown mutant *br-1*, which was relatively early [70,71]. X22 descends both from *br-1* and TS12, so we infer that it inherited its copy of chromosome 3 from the former (indicated by cyan lines). XP55 and its descendent XP99 descend in part from X22 [43] but lack the duplication. This is expected because they carry the *bsg4* mutation on that chromosome, inherited from NP194, which descends from the Newell laboratory stock of DdB [42,55]. This line of descent is shown in green. XP99 descends in part from Ax3, and possesses a duplication of chromosome 5 sequence common in derivatives of it. We can trace chromosome 5 of XP99 back to strain X2, because its offspring NP62 gained the *cobA* mutation on this chromosome [43]. We assume that X2 inherited chromosome 5 from Ax3 via NP2; this line to XP99 is marked in red. The relationship of NC4(B) with other strains is uncertain.

**Figure S3 (Additional data file 3).** NP81 and HU32 show multiple copy number variants. Chromosome 5 data are shown for both strains; all other chromosomes also show apparent losses relative to the reference strain, and duplications observed are

listed in Table 2. The single clear duplication on chromosome 5 shown here is the one also found in many Ax3 descendents.
