# Supplementary material for: Widespread duplications in the genomes of laboratory stocks of Dictyostelium discoideum
Source: PubMed Central journal article supplement (PMC2643946; doi:10.1186/gb-2008-9-4-r75), 2008-04-22

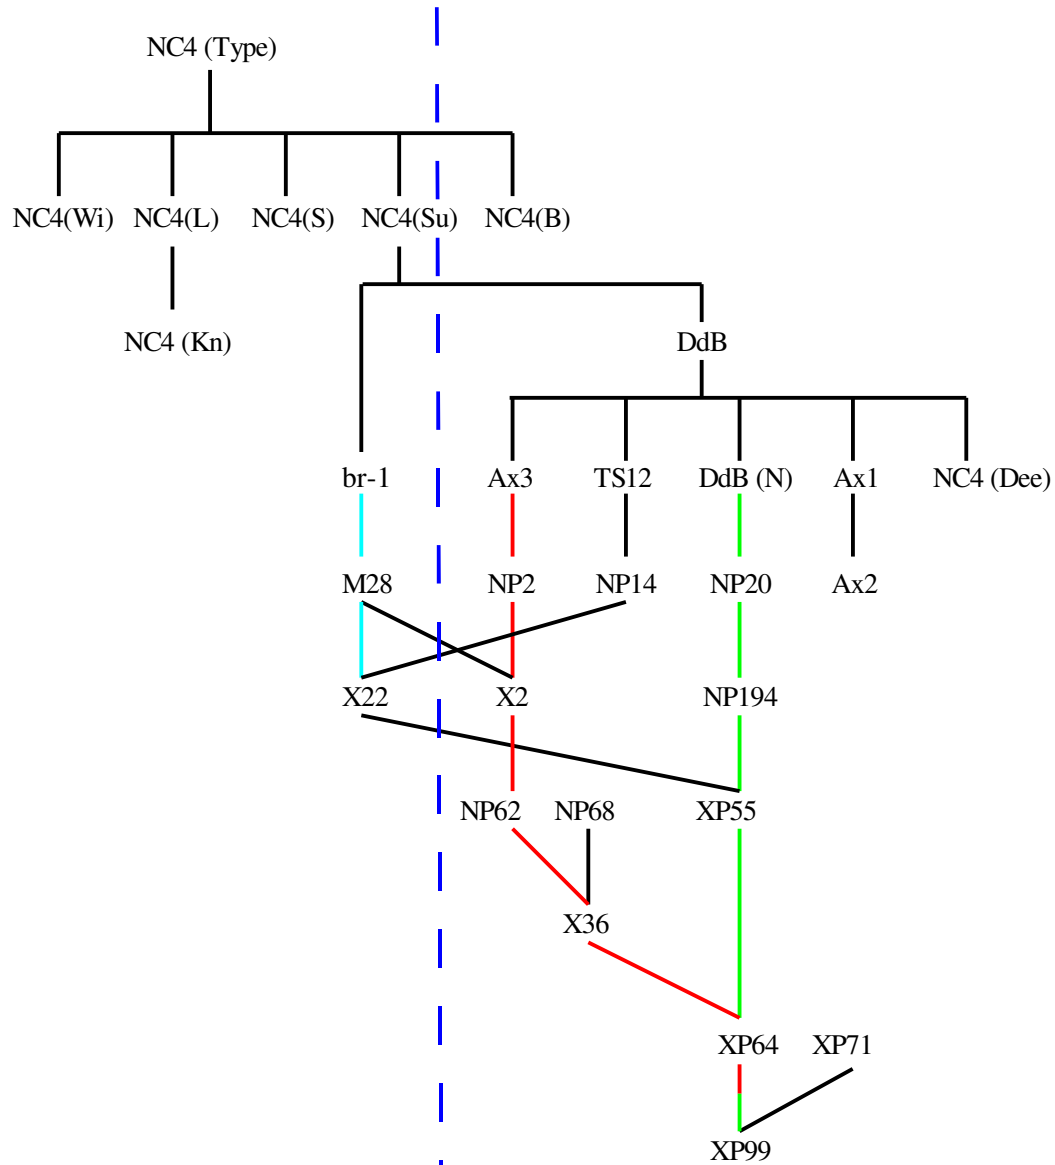

Supplement: gb-2008-9-4-r75-S2.pdf [file gb-2008-9-4-r75-S2.pdf]
