# Supplementary material for: Widespread duplications in the genomes of laboratory stocks of Dictyostelium discoideum
Source: PubMed Central journal article supplement (PMC2643946; doi:10.1186/gb-2008-9-4-r75), 2008-04-22

**A****NP81 chr5**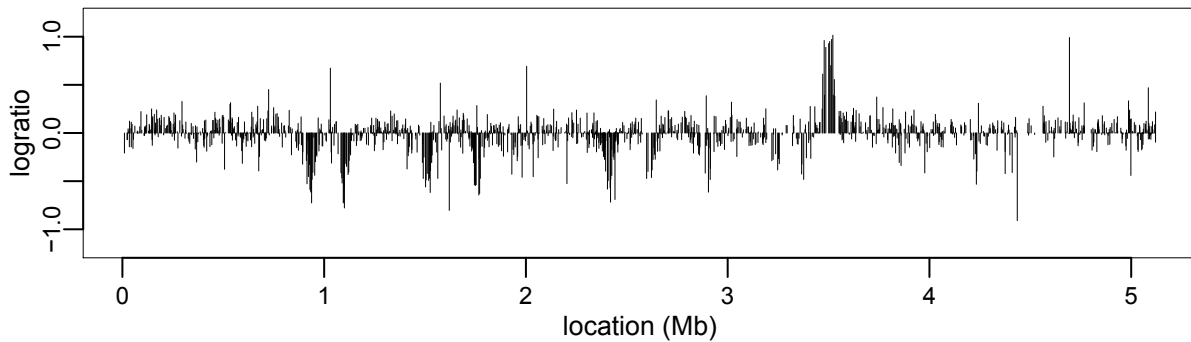**B****HU32 chr5**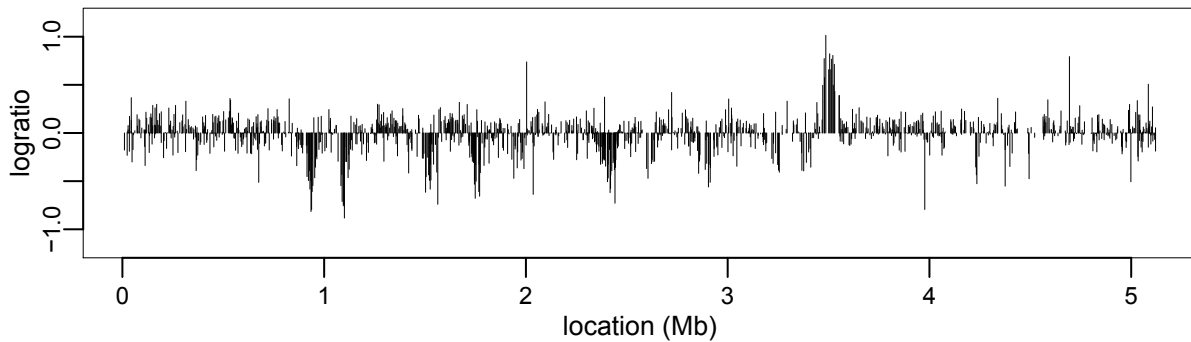

Supplement: gb-2008-9-4-r75-S3.pdf [file gb-2008-9-4-r75-S3.pdf]
